# Supplementary material
Source: publisher site journal article supplement (https://www.dovepress.com/article/374684)
Supplement: Supplementary file 1 [file get_supplementary_file.php]

Table S1 Primer sequences of genes for RT-qPCR.

| Gene | Primer (5’-3’) |
| --- | --- |
| CDKN1A | F: CTTGTACCCTTGTGCCTCGC  R: GCGTTTGGAGTGGTAGAAATCTGT |
| HDAC1 | F: ACGACGGGGATGTTGGAAAT  R: TGGCTTTGTGAGGGCGATAG |
| ACTB | F: CCTTCCTTCCTGGGCATGG  R: GATCTTCATTGTGCTGGGTGC |

Abbreviations: F, forward; R, reverse.

Table S2 23 DESRGs in the COPD samples compared to the healthy samples.

| Gene symbol | Description | LogFC | p.adjust | Changes |
| --- | --- | --- | --- | --- |
| NOTCH3 | notch 3 | -1.502 | 4.49E-07 | Down |
| CAV1 | caveolin 1 | -1.357 | 1.20E-04 | Down |
| GAPDH | glyceraldehyde-3-phosphate dehydrogenase | -1.062 | 2.79E-04 | Down |
| SMARCA4 | SWI/SNF related, matrix associated, actin dependent regulator of chromatin, subfamily a, member 4 | -1.043 | 2.26E-02 | Down |
| HDAC1 | histone deacetylase 1 | -1.036 | 1.08E-04 | Down |
| ID4 | inhibitor of DNA binding 4, HLH protein | -1.005 | 1.94E-02 | Down |
| EWSR1 | EWS RNA binding protein 1 | 1.059 | 5.27E-07 | Up |
| PRPF19 | pre-mRNA processing factor 19 | 1.059 | 4.63E-05 | Up |
| PML | promyelocytic leukemia | 1.062 | 4.54E-05 | Up |
| MAGOH | mago homolog, exon junction complex core component | 1.072 | 7.43E-06 | Up |
| FBXO31 | F-box protein 31 | 1.094 | 1.61E-08 | Up |
| MCL1 | BCL2 family apoptosis regulator | 1.112 | 1.79E-06 | Up |
| HK3 | hexokinase 3 | 1.163 | 9.31E-05 | Up |
| BAG3 | BCL2 associated athanogene 3 | 1.193 | 5.74E-04 | Up |
| RSL1D1 | ribosomal L1 domain containing 1 | 1.242 | 9.66E-08 | Up |
| STK32C | serine/threonine kinase 32C | 1.268 | 1.97E-07 | Up |
| LIMK1 | LIM domain kinase 1 | 1.271 | 1.17E-06 | Up |
| PIM1 | Pim-1 proto-oncogene, serine/threonine kinase | 1.437 | 1.47E-05 | Up |
| CDKN1A | cyclin dependent kinase inhibitor 1A | 1.472 | 4.10E-04 | Up |
| ATM | ATM serine/threonine kinase | 1.724 | 2.99E-09 | Up |
| YAP1 | Yes associated protein 1 | 1.751 | 2.39E-09 | Up |
| MMP9 | matrix metallopeptidase 9 | 1.767 | 3.77E-03 | Up |
| SNAI1 | snail family transcriptional repressor 1 | 1.797 | 1.49E-04 | Up |

Abbreviations: COPD, chronic obstructive pulmonary disease; DESRGs, differentially expressed senescence-related genes

Table S3 The correlation analysis between the GOLD stage and clinical characteristics of patients.

|  |  | GOLD1-2 | GOLD3-4 | no COPD | Value | P. value |
| --- | --- | --- | --- | --- | --- | --- |
| Age(years) | <60 | 7 | 0 | 6 | 0.512 | 1 |
| ≥60 | 16 | 1 | 14 |
| Smoke(pack-years) | ≤20 | 9 | 0 | 20 | 22.058 | ＜0.001 |
| >20 | 14 | 1 | 0 |
| BMI(Kg/m2) | <24 | 14 | 1 | 5 | 6.635 | 0.022 |
| ≥24 | 9 | 0 | 15 |

Abbreviations: BMI, body mass index; COPD, chronic obstructive pulmonary disease; GOLD, global initiative for chronic obstructive lung Disease.
